1 **Distress symptoms of old age and mild cognitive impairment are two distinct**  
2 **dimensions in older adults without major depression: effects of adverse childhood**  
3 **experiences and negative life events.**

4

5 (1,2) Vinh-Long Tran-Chi<sup>\*</sup>; (1-9) Michael Maes<sup>\*</sup>; (2,10) Gallayaporn Nantachai; (2,9)  
6 Solaphat Hemrungronj; (11-14) Marco Solmi; (2,8) Chavit Tunvirachaisakul

7

8 \*These authors contributed equally to this work and share first authorship

9

10 (1) Ph.D. Program in Clinical Sciences, School of Global Health, Faculty of Medicine,  
11 Chulalongkorn University, Bangkok, Thailand.

12 (2) Department of Psychiatry, Faculty of Medicine, Chulalongkorn University, Bangkok,  
13 Thailand.

14 (3) Research Institute, Medical University of Plovdiv, Plovdiv, Bulgaria.

15 (4) Department of Psychiatry, Medical University of Plovdiv, Plovdiv, Bulgaria.

16 (5) Sichuan Provincial Center for Mental Health, Sichuan Provincial People's Hospital,  
17 School of Medicine, University of Electronic Science and Technology of China,  
18 Chengdu, China.

19 (6) Key Laboratory of Psychosomatic Medicine, Chinese Academy of Medical Sciences,  
20 Chengdu, China.

21 (7) Kyung Hee University, 26 Kyunghedae-ro, Dongdaemun-gu, Seoul, South Korea.

22 (8) Cognitive Impairment and Dementia Research Unit, Department of Psychiatry,  
23 Faculty of Medicine, Chulalongkorn University, Bangkok, Thailand.

24 (9) Cognitive Fitness and Biopsychiatry Technology Research Unit, Faculty of Medicine,  
25 Chulalongkorn University, Bangkok, Thailand.

26 (10) Somdet Phra Sungharaj Nyanasumvara Geriatric Hospital, Department of Medical  
27 Services, Ministry of Public Health, Chon Buri Province, Thailand.

28 (11) Department of Psychiatry, University of Ottawa, Ontario, Canada.

29 (12) Regional Centre for the Treatment of Eating Disorders and On Track, The  
30 Champlain First Episode Psychosis Program, Department of Mental Health, The Ottawa  
31 Hospital, Ontario, Canada.

32 (13) Ottawa Hospital Research Institute (OHRI), Clinical Epidemiology Program,  
33 University of Ottawa, Ottawa, Ontario, Canada.

34 (14) Department of Child and Adolescent Psychiatry, Charité Universitätsmedizin,  
35 Berlin, Germany.

36

37 **Correspondence:**

38 Prof. Dr. Michael Maes, M.D., Ph.D.

39 Sichuan Provincial Center for Mental Health

40 Sichuan Provincial People's Hospital

41 School of Medicine

42 University of Electronic Science and Technology of China

43 Chengdu 610072

44 China

45 [Michael Maes Google Scholar profile](#)

46 [dr.michaelmaes@hotmail.com](mailto:dr.michaelmaes@hotmail.com)

47 **E-mail addresses:**

48 Vinh-Long Tran-Chi: [6478308230@student.chula.ac.th](mailto:6478308230@student.chula.ac.th)

49 Michael Maes: [dr.michaelmaes@hotmail.com](mailto:dr.michaelmaes@hotmail.com)

50 Gallayaporn Nantachai: [gallayaporn@gmail.com](mailto:gallayaporn@gmail.com)

51 Solaphat Hemrungronj: [solaphat@hotmail.com](mailto:solaphat@hotmail.com)

52 Marco Solmi: [marco.solmi83@gmail.com](mailto:marco.solmi83@gmail.com)

53 Chavit Tunvirachaisakul: [chavit.t@chula.ac.th](mailto:chavit.t@chula.ac.th)

54

55 **Abstract:**

56 **Background:** Studies in old adults showed bidirectional interconnections between  
57 amnesic mild cognitive impairment (aMCI) and affective symptoms and that adverse  
58 childhood experiences (ACE) may affect both factors. Nevertheless, these associations  
59 may be confined to older adults with clinical depression.

60 **Aims:** To delineate the relationship between clinical symptoms of aMCI and affective  
61 symptoms in older adults without major depression (MDD) or dysfunctions in activities  
62 of daily living (ADL).

63 **Methods:** This case-control study recruited 61 participants with aMCI (diagnosed using  
64 Petersen's criteria) and 59 older adults without aMCI and excluded subjects with MDD  
65 and ADL dysfunctions.

66 **Results:** We uncovered 2 distinct dimensions, namely distress symptoms of old age  
67 (DSOA) comprising anxiety, depression, perceived stress and neuroticism scores, and  
68 mild cognitive dysfunctions (mCoDy) comprising episodic memory test scores, and the  
69 total Mini-Mental State Examination (MMSE) and Montreal Cognitive Assessment  
70 (MoCA) scores. A large part of the variance (37.9%) in DSOA scores was explained by  
71 ACE, negative life events (health and financial problems), a subjective feeling of  
72 cognitive decline, and education (all positively). While ACE and NLE have a highly  
73 significant impact on the DSOA, they are not associated with the mCoDy scores. Cluster  
74 analysis showed that the diagnosis of aMCI is overinclusive because some subjects with  
75 DSOA symptoms may be incorrectly classified as aMCI.

76 **Conclusions:** The clinical impact is that clinicians should carefully screen older adults  
77 for DSOA after excluding MDD. DSOA might be misinterpreted as aMCI.

78 **Keywords:** depression, adverse childhood experiences, mild cognitive impairments,

79 affective disorders, negative life events, neurocognitive deficits

80

81 **Introduction**

82 Mild cognitive impairment (MCI) has been observed to have a significant prevalence  
83 among the elderly population affecting approximately 10-15% of individuals aged 65 and  
84 above <sup>1</sup>. Mild deficits in episodic memory, executive functions, visuospatial skills,  
85 processing speed, cognitive flexibility, and problem-solving capacity are prominent  
86 characteristics of amnesic mild cognitive impairment (aMCI), while fundamental  
87 activities associated with daily living (ADL) remain unimpaired <sup>2-4</sup>. aMCI can be seen as  
88 a cognitive phase that lies between the normal aging process and the onset of dementia <sup>1</sup>.  
89 It is worth noting that the annual conversion rate of aMCI to Alzheimer's disease (AD) is  
90 approximately 16.5%, although a small proportion of aMCI patients (8%) experience a  
91 recovery from this condition <sup>5</sup>.

92 The Consortium to Establish a Registry for Alzheimer's Disease (CERAD)  
93 developed a neuropsychological test battery to evaluate patients with neurocognitive  
94 deficits including MCI <sup>6</sup>. The CERAD tests indicate that individuals with MCI have  
95 deficits in verbal fluency tasks (VFT), as well as word list memory (WLM) and word list  
96 recognition (WLR) <sup>7</sup>. Age is a crucial determinant in comprehending cognitive decline  
97 due to the frequent association between MCI and the process of aging <sup>7</sup>. Moreover,  
98 education level is frequently regarded as a potential confounding variable in cognitive  
99 decline research because it can affect cognitive performance; higher levels of education  
100 are associated with greater cognitive reserve, which may delay the onset of cognitive  
101 impairment or dementia <sup>7,8</sup>.

102 Previous research has indicated that adverse childhood experiences (ACE),  
103 encompassing various forms of abuse (physical, emotional, and sexual), neglect (physical

104 and emotional), and family dysfunctions, are significantly correlated with later cognitive  
105 impairments<sup>9-11</sup>. Negative Life Events (NLE), such as severe illness, and financial  
106 problems, may be associated with increasing cognitive decline in older adults<sup>12-14</sup>.

107 Late-life depression is a strong risk factor for normal subjects progressing to MCI  
108<sup>15</sup> and dementia<sup>14</sup>. Several systematic reviews and meta-analyses of environmental risk  
109 factors for late-life depression have been published<sup>16-18</sup>. MCI patients have higher rates  
110 of depression than normal adults, and those rates are independent from age, race, gender,  
111 and study type<sup>19</sup>. A meta-analysis showed the prevalence of depression in patients with  
112 MCI is as high as 32%<sup>20</sup>. Educational attainment is associated with depressive symptoms  
113 of aging<sup>21</sup>, and older adults with lower education attainment showed to have higher  
114 depressive symptoms<sup>22</sup>. Recently, Jirakran, Vasupanrajit, Tunvirachaisakul and Maes<sup>23</sup>  
115 detected that in adult depression one factor could be extracted from increased depression,  
116 perceived stress, neuroticism, and anxiety scores, indicating that these domains are all  
117 manifestations of the underlying construct. However, there are no data whether in older  
118 adults one factor may be extracted from stress, anxiety, depression, and neuroticism  
119 domain scores.

120 ACE and NLE are associated with the onset of depressive symptoms<sup>24</sup> and with  
121 higher odds of late-life depressive symptoms<sup>25</sup>. Increased levels of depressive symptoms  
122 and ACE exposures are associated with an increased risk of depressive symptoms in the  
123 elderly<sup>26-30</sup>. However, no research has examined whether age, educational attainment,  
124 ACE, NLE, have cumulative effects in predicting severity of mild cognitive impairments  
125 in older adults. Moreover, there are no data indicating whether in older adults, cognitive  
126 symptoms are associated with affective symptoms or whether neurocognitive and

127 affective symptoms are independent phenomena. Furthermore, there are no data whether  
128 ACE and NLE are independently associated with the neurocognitive deficits in older  
129 adults after considering the effects of affective symptoms.

130 Hence, the study aims to delineate the relationship between clinical symptoms of  
131 MCI and affective symptoms, and whether in older adults without major depression, ACE  
132 and NLE predict neurocognitive deficits independently from affective and distress  
133 symptoms. In addition, we examine whether in older adults one factor may be extracted  
134 from depressive, anxiety, neuroticism, and perceived distress symptoms, and whether  
135 cognitive deficits are part of this factor.

136

## 137 **Material and methods**

### 138 *Participants*

139 A cross-sectional study was conducted to compare individuals with aMCI to a  
140 group of healthy control subjects. The study sample comprised individuals of both  
141 genders, with an age range spanning from 60 to 75 years. The study recruited healthy  
142 participants from Bangkok, Thailand, whereas individuals with aMCI were recruited  
143 from the Outpatient Department of the Dementia Clinic at King Chulalongkorn Memorial  
144 Hospital in Bangkok, Thailand from May 2022 to March 2023. The clinical Petersen's  
145 criteria were utilized to diagnose aMCI in the older adult population.<sup>31</sup> These criteria  
146 involve the identification of subjective and objective memory impairments, together with  
147 the lack of dementia and alterations in activities of daily living (ADL). Furthermore,  
148 people with amnesic mild cognitive impairment (aMCI) complied with the Petersen  
149 criteria and exhibited a modified Clinical Dementia Rating (CDR) score of 0.5. The



150 control group had a CDR score of 0 and did not meet Petersen's criteria <sup>31</sup>. The healthy  
151 older adults were recruited from the Health Check-up Clinic, members of  
152 neighbourhoods' senior clubs, healthy elderly carers of individuals with aMCI) who were  
153 patients at the Dementia Clinic, and senior volunteers affiliated with the Red Cross.

154 Participants with stroke, Parkinson's disease, any dementia subtype, multiple  
155 sclerosis, schizophrenia, bipolar disorder, autism, delirium, metabolic disorder, malaria,  
156 HIV, chronic obstructive pulmonary disease (COPD), chronic kidney disease, cancer,  
157 substance abuse, alcoholism, inability to speak or communicate, blindness or impaired  
158 vision even with corrective lenses, hearing loss, inability to sit stably due to physical  
159 conditions such as chronic pain or low back pain, and those who had undergone cognitive  
160 training within three months prior to the study were excluded from the study. Ultimately,  
161 the entirety of the subjects was allocated to either of the two study groups, consisting of  
162 59 individuals classified as healthy controls and 61 individuals diagnosed with aMCI.

163 Before taking part in the study, all volunteers, and individuals were required to  
164 submit written informed consent. The study conducted in this research adhered to ethical  
165 and privacy standards that are recognized both in Thailand and internationally. These  
166 standards are in accordance with the International Guideline for the Protection of Human  
167 Subjects, as mandated by influential documents such as the Declaration of Helsinki, the  
168 Belmont Report, the International Conference of Harmonization in Good Clinical  
169 Practice, and the CIOMS Guidelines. The present study received approval from the  
170 Institutional Review Board (IRB) of the Faculty of Medicine at Chulalongkorn  
171 University in Bangkok, Thailand (No. 0372/65).

172 *Clinical assessments*

173 **Neurocognition**

174 We used a semi-structured interview to collect socio-demographic data  
175 comprising age, sex, relationship status, year of education, and marital status. The scales  
176 used to assess cognition were the Thai Mini-Mental State Examination (MMSE)<sup>32</sup>, the  
177 Thai Montreal Cognitive Assessment (MoCA)<sup>33</sup>, and three rating scales of the Thai  
178 Consortium to Establish a Registry for Alzheimer's Disease (CERAD)  
179 Neuropsychological Assessment Battery<sup>7</sup>. The MMSE is a 30-question assessment of  
180 cognitive function<sup>34</sup>. The Thai version of the Mini-Mental State Examination was  
181 developed in 1993 and has been extensively used in Thailand to screen cognitive  
182 impairment and dementia<sup>32</sup>. The scale consists of six subtests measuring orientation,  
183 registration, attention, word recall, language, and computation. The total score ranges  
184 from 0 to 30. The MoCA was developed by Nasreddine, Phillips, Bédirian, Charbonneau,  
185 Whitehead, Collin, Cummings and Chertkow<sup>35</sup> as an effective and applicable screening  
186 tool for cognitive disorders. The Thai version of MoCA was used to screen and monitor  
187 cognitive impairments in the clinical practice of neurocognitive disorders validated in the  
188 Thai setting by Tangwongchai, Phanasathit, Charemboon, Akkayagorn, Hemrungronj,  
189 Phanthumchinda and Nasreddine<sup>33</sup>. This test measures various cognitive domains,  
190 namely: visuospatial/executive, naming, attention, language, abstraction, delayed recall,  
191 and orientation. The total sum of all individual scores (out of 30 maximum possible  
192 points) represents the severity of cognitive impairment. The CERAD was developed in  
193 1986 by the National Institute of Aging as a standardized, validated instrument to assess  
194 Alzheimer's dementia. In the current study, we employ the Neuropsychological

195 Assessment Battery (CERAD-NP), in a Thai validated translation <sup>7</sup>. In this study, we  
196 used: the Word List Memory (WLM) to assess episodic memory and learning ability for  
197 new verbal information and immediate working memory; and Word List Recall, Delayed,  
198 True Recall (WLR) recognize to probe verbal episodic memory and the ability to recall.  
199 Verbal Fluency Test (VFT), assessing semantic memory or fluency, verbal productivity,  
200 language, and cognitive flexibility.

201

## 202 **Psychological symptoms**

203 Neuroticism traits were assessed with the Thai version of the 8-item subscale of  
204 the Five Factor Model standardized psychometric pool of items (IPIP-NEO; See  
205 <http://ipip.ori.org>) <sup>36</sup>. The neuroticism subscale measures one's tendency to experience  
206 negative emotions ("Have frequent mood swings"), and each item was rated on a 5-point  
207 Likert scale of 1 (Strongly Disagree) to 5 (Strongly Agree).

208 Stress symptoms were assessed using the 10-item *Perceived Stress Scale* (PSS)  
209 developed by Cohen and Williamson <sup>37</sup> and validated for use in a Thai setting by  
210 Wongpakaran and Wongpakaran <sup>38</sup>. The scale assesses symptoms experienced during the  
211 last month preceding the survey. Each item is rated on a 5-point Likert-type scale from 0  
212 (never) to 4 (very often). A higher score indicates greater distress. The Negative Life  
213 Events (NLE) is used to assess daily hassles <sup>39</sup>. The NLE comprises 46 items covering the  
214 interpersonal stress in 10 domains, namely: household (6 items), problems with your  
215 work supervisor/employer (4 items), problems with parents (4 items), problems with  
216 spouse/partner (5 items), money hassles (4 items), problems with children (3 items),  
217 problems with friends (4 items), problems with other relatives (4 items), health hassles (4

218 items), problems with other workers (4 items), and work hassles (4 items). Participants  
219 indicate how much of a hassle each of the stressors was for them, using a 5-point Likert  
220 scale ranging from 0 (no hassle) to 4 (extreme hassle), and the scores were totalled to  
221 produce an overall hassles score. The NLE was back translated into Thai by Boonyamalik  
222 <sup>40</sup>.

223 Anxiety symptoms were assessed with the 20-item *State-Trait Anxiety Inventory*  
224 (STAI) developed by Spielberger, Gorsuch, Lushene, Vagg and Jacobs <sup>41</sup>, and has been  
225 validated in the Thai setting by Iamsupasit and Phumivuthisarn <sup>42</sup>. Each item is rated on a  
226 4-point Likert scale ranging from 1 (not at all) to 4 (mostly). The total score ranges from  
227 20-80 and higher scores are associated with greater feelings of anxiety. We also used the  
228 *anxiety subscale of the Hospital Anxiety and Depression Scale (HADS-A)* to assess  
229 severity of anxiety <sup>43</sup>. The scale has been validated in the Thai setting by Nilchaikovit <sup>44</sup>.  
230 This instrument consists of seven items rated on a four-point scale from 0 (not at all) to 3  
231 (very often indeed), with five items reverse coded. The scores of the seven items were  
232 summed to create a scale that ranged from 0 to 21, with higher scores indicating more  
233 symptoms of anxiety. At the cutoff score  $\geq 11$ , which was the best cutoff score, the  
234 sensitivity of the anxiety subscale of Thai HADS was 100% and the sensitivity was 86%.

235 The *Geriatric Depression Scale (GDS)* is a 30-item self-report measure designed  
236 to assess and screen depressive symptoms among older adults <sup>45</sup>. It is a popular and  
237 widely used screening test to measure depression. The scale was validated and used with  
238 Thai elderly people for nearly three decades <sup>46</sup> (Train the Brain Forum Committee,  
239 1994), with each response rated on a dichotomous scale of 0 and 1. A total score greater  
240 than 12 indicates depression, with higher scores suggesting a higher level of depression.

241 The pooled sensitivity and specificity of Thai GDS-30 are 82% and 76%<sup>47</sup>. In addition,  
242 we used the *depression subscale of the Hospital Anxiety and Depression Scale* (HADS-  
243 D)<sup>43</sup>. It has been validated in the Thai setting by Nilchaikovit<sup>44</sup>. This instrument consists  
244 of seven items rated on a four-point scale from 0 (not at all) to 3 (very often indeed), with  
245 three items reverse coded. The scores of the seven items were summed to create a scale  
246 that ranged from 0 to 21, with higher scores indicating more symptoms of depression. At  
247 the cutoff score  $\geq 11$ , which was the best cutoff score, the sensitivity of the depression  
248 subscale of Thai HADS was 85.71% respectively, while the specificity was 91.3%.

249 The original Adverse Childhood Experiences (ACE) study was used to identify  
250 childhood experiences of abuse or neglect at Kaiser Permanente from 1995 to 1997 with  
251 two waves of data collection<sup>48</sup>. ACE were assessed using the Adverse Childhood  
252 Experiences Questionnaire in a Thai translation<sup>49</sup>. This questionnaire consists of 28  
253 items covering the traumatic experiences in childhood in 10 domains, namely:  
254 psychological abuse (2 items), physical abuse (2 items), sexual abuse (4 items), mental  
255 neglect (5 items), physical neglect (5 items), domestic violence (4 items), substance  
256 abuse in the family (2 items), family psychiatric illness (2 items), separation or divorce in  
257 the family (1 item), and family members in criminals (1 item)<sup>49</sup>.

258

### 259 ***Data analysis***

260 Differences in continuous variables between groups were checked using analysis  
261 of variance (ANOVA). Analysis of contingency tables (the  $\chi^2$ -test) was used to  
262 determine the association between nominal variables. Correlations between two variables  
263 were assessed using Pearson's product-moment correlation coefficients. Univariate

264 general linear model (GLM) analysis was used to examine the relationships between  
265 diagnostic classifications and clinical and cognitive data after covarying for gender, age,  
266 and education. Subsequently, the estimated marginal means (SE) were computed from  
267 the GLM model after adjusting for the gender, age, and education variables. To examine  
268 pair-wise differences in group means, we employed the protected least significant  
269 difference. We performed multiple regression analysis to determine which test scores best  
270 predicted the clinical scores using a stepwise algorithm and to compute and display  
271 partial regression analysis of clinical data. For this analysis, we always confirmed  
272 multivariate normality, homoscedasticity, and the absence of collinearity and  
273 multicollinearity. The regression analyses' results were always bootstrapped using 5,000  
274 bootstrap samples, and the latter were reported if the findings were not concordant.  
275 Statistical tests were two-tailed and a p-value of 0.05 was used for statistical significance.  
276 IBM SPSS Windows version 29 was used for all statistical analyses.

277 Using the precision nomothetic approach <sup>46</sup>, we aim to construct new phenotypes  
278 or phenotype dimensions by combining clinical data, rating scale scores and  
279 neurocognitive tests results. A two-step cluster analysis was performed considering  
280 categorical and continuous variables. The adequacy of the cluster solution was  
281 determined by evaluating the silhouette measure of cohesion and separation, which was  
282 deemed satisfactory if it exceeded a threshold of 0.3. Principal components analysis  
283 (PCA) was performed, and the Kaiser–Meier–Olkin (KMO) sample adequacy measure  
284 was used to assess factorability (sufficient when  $> 0.7$ ). Moreover, when all loadings on  
285 the first factor were  $> 0.66$ , the variance explained by the first factor was  $> 50\%$ , and

286 Cronbach's alpha performed on the variables was  $> 0.7$ , the first PC was regarded as a  
287 valid latent construct underpinning the variables.

288 Partial Least Squares path analysis (SmartPLS 4.0) was employed to check the  
289 paths between ACE, NLE, CERAD, MCI, and DSOA scores. Each variable was input as  
290 a single indicator (e.g., age and education; NLE health+money) or as reflective or  
291 formative constructs. We entered two reflective models: a) a first factor extracted from  
292 neuroticism, HADS-D, HADS-A, PSS, STAI, and GDS (thus reflecting the DSOA  
293 construct), and b) a second from MMSE, MOCA and Petersen item 1 (thus reflecting  
294 MCI). Moreover, we entered two formative models: a) a first based on emotional abuse,  
295 emotional neglect, and physical neglect (a composite of ACE); and b) a second formative  
296 model based on three CERAD test results, namely VFT, WLM and WLR. We conducted  
297 complete PLS analysis using 5,000 bootstrap samples only when the outer and inner  
298 models complied with quality data, namely the factors have an adequate average variance  
299 extracted (AVE)  $> 0.5$ , and  $\rho_a > 0.8$ ; all LV loadings are  $> 0.66$  at  $p < 0.001$ ; the  
300 model fit as assessed with SRMR is adequate (SRMR  $< 0.08$ ); and Confirmatory Tetrad  
301 analysis (CTA) shows that the LV is not mis specified as a reflective model.

302

## 303 **Results**

### 304 *Results of factor analyses*

305 We employed principal component analysis (PCA) to examine whether latent  
306 vectors could be extracted from neuroticism (IPIP-NEO subdomain), PSS, HADS-A,  
307 HADS-D, STAI, TGDS. Table 1 shows the results of these PC analyses. The first PCA  
308 showed a sufficient factorability of the correlation matrix and the first factor explained

309 60.14% of the variance and all factor loadings were  $> 0.670$  with an adequate Cronbach's  
310 alpha value. This first PC, therefore, was dubbed the “Distress Symptoms of Old Age” or  
311 “DSOA”. We could also extract a single latent vector from the MoCA, TMSE, CERAD-  
312 WLR, and CERAD WLM with adequate KMO and explained variance values, and a  
313 sufficient Cronbach's alpha value (see Table 1). Because this PC reflect a mild cognitive  
314 dysfunction, it was labelled as mCoDy. The VFT and CDR scores did not load highly on  
315 this PC ( $<0.5$ ) and were, therefore, deleted from the PCA #2 model. Nevertheless, we  
316 were able to extract one validated PC from the MoCa, MMSE and CDR scores (see Table  
317 1). Because this PC comprises the CDR score (0: control, 0.5: aMCI) we called this PC  
318 “quantitative MCI (qMCI).” As such, we computed two different cognitive impairment  
319 scores, a first focusing on mild memory impairments and a second on a mild, more  
320 generalized cognitive decline. We were unable to combine any of the cognitive test  
321 results with the affective, stress, anxiety, or neuroticism scores. **Figure 1** shows that there  
322 is no significant association between the DSOA and mCoDy PC scores.

323

### 324 *Socio-demographic and Clinical Data*

325 A two-step clustering analysis with automatic determination of the number of  
326 clusters and Schwarz’s Bayesian Criterion (BIC) was conducted to determine if genuine  
327 clusters of subjects with aMCI or affective symptoms could be identified. Toward this  
328 end we performed two-step cluster analysis using the following variables: clinical  
329 diagnosis of aMCI, neuroticism, PSS, STAI, HADS-A, HAD-D, TGDS, WLM, WLR,  
330 VFT, MoCa and MMSE scores. Automatic determination of the number of clusters  
331 showed that three clusters could be retrieved from the data set with a silhouette measure



332 of cohesion and separation of 0.4, indicating a fair cluster solution. There were 37  
333 subjects in cluster 1, 31 in cluster 2, and 52 in cluster 3.

334 **Table 2** shows the features of the three groups. Cluster 3 individuals were  
335 significantly older and has significantly lower education years than cluster 1 and cluster 2  
336 individuals. Of the 59 healthy controls included in the study, the cluster analyses  
337 allocated 34 to the control group, 22 to cluster 2 and 3 to cluster 3. Of the 61 subjects  
338 with aMCI included in the study, the cluster analysis allocated 49 to cluster 3, 9 to cluster  
339 2 and 3 to cluster 1 (see Table 2). From the demographics and clinical features of the  
340 three study groups, no significant differences were found in sex, or marital status  
341 distribution between the three groups. The DSOA score are significantly different  
342 between the three cluster and increased from cluster 1 to cluster 3 to cluster 2. The  
343 mCoDy scores were significantly greater in cluster 3 than in cluster 1 and 2; there were  
344 no significant differences between cluster 1 and 2 in the mCoDy scores. Therefore, we  
345 have labelled cluster 2 as a DSOA cluster, cluster 2 as a mCoDy cluster, and cluster 1 as  
346 the control cluster. The differences between these three clusters in DSOA ( $F=49.30$ ,  
347  $df=2/113$ ,  $p<0.001$ ) and mCoDy ( $F=78.01$ ,  $df=2/113$ ,  $p<0.001$ ) score as well as the  
348 intergroup differences remained significant after covarying for age, sex, and education.  
349 Neuroticism, PSS, HADS-A, HADS-D, and STAI scores were significantly different  
350 between the three groups and increased from controls to mCoDy to DSOA. VFT, WLM,  
351 WLR and MMSE scores were significantly lower in mCoDy participants than in controls  
352 and DSOA subjects. The MoCA score was significantly different between the three  
353 clusters as decreased from controls to the DSOA to mCoDy clusters.

354

355 *Differences in ACE and NLE scores between the diagnostic groups*

356 **Table 3** shows that the ACE and NLE scores in the three clusters. While there  
357 were no significant differences in the 5 ACE that were examined in this study, subjects  
358 with DSOA showed significant increased ACE scores as compared with controls.  
359 Although there was no overall significance between the three clusters in total NLE score,  
360 there was a trend towards higher NLE scores in the DSOA cluster as compared with the  
361 control cluster, while subjects in the mCoDy cluster took up an intermediate position.  
362 Examining the separate NLE items showed that the sum of money + health NLE scores  
363 was significantly higher in both the DSOA and mCoDy subjects as compared with  
364 controls.

365

366 *Prediction of the DSOA and mCoDy scores*

367 We performed different multiple regression analyses using the DSOA and  
368 mCoDy scores as dependent variables and age, sex, education, NLE, and ACE data as  
369 explanatory variables (with and without Petersen item 1) See **Table 4**. Regression #1  
370 shows that 32.8% of the variance in DSOA score could be explained by NLE  
371 health+money, ACE neglect, and education (all three positively associated). **Figure 2**  
372 shows the partial regression plot (after considering the effects of age, sex, education) of  
373 the DSOA score on NLE health+money showing a significant positive association  
374 between both variables. **Figure 3** shows the partial regression plot of the DSOA score on  
375 ACE neglect (after adjusting for age, sex, and education). **Figure 4** shows the partial  
376 regression plot of the mCoDy score on education years. Table 4, regression #2 shows the

377 prediction of the DSOA score was somewhat improved after considering the effects of  
378 Petersen, item 1. Thus, 37.9% of the variance in DSOA score could be explained by NLE  
379 health+money, ACE neglect, education, and Petersen\_1 (all positively associated). The  
380 latter is important as it shows that subjective feelings of cognitive impairment, but not  
381 objective measurements of cognitive impairment, may increase DSOA.

382 Table 4, regression #3 shows that 19.0% of the variance in the mCoDy score was  
383 explained by the combined effects of age and education. There were no significant effects  
384 of the NLE or ACE variables on the mCoDy score.

385

### 386 *Results of PLS-path analysis*

387 **Figure 5** shows the final PLS model after feature reduction (e.g., sex was  
388 excluded as there were no significant effects). We entered Petersen item 1, qMCI (a  
389 proxy of the MCI diagnosis), and the CERAD tests results as predictors of DSOA to  
390 examine if the latter was predicted by any of these clinical cognitive data. We entered  
391 two latent vectors, one reflecting clinical MCI symptom severity (extracted from CRC,  
392 MoCA and MMSE scores), and a second reflecting DSOA (extracted from HADS\_A,  
393 HADS\_D, neuroticism, PSS, STAI, and TGDS scores). ACE and CERAD were entered  
394 as two formative models using emotional abuse and neglect, and physical neglect, and  
395 VFT, WLR, and WLM, respectively. All other variables were entered as simple  
396 indicators. The model fit was more than adequate with a SRMR of 0.055. We observed  
397 adequate convergence and construct reliability validity values for (a) the DSOA latent  
398 factor with AVE = 0.598, and  $\rho_a = 0.871$ , while all loadings were  $> 0.680$  at  $p <$   
399 0.001; and (b) the MCI factor with AVE = 0.770, and  $\rho_a = 0.864$ , while the loadings

400 of the MCI construct were  $> 0.771$ . Both latent vectors were not mis-specified as  
401 reflective models (results of CTA). Complete PLS analysis, performed using 5,000  
402 bootstraps, showed that 40.9% of the variance in the DSOA score was explained by the  
403 clinical Petersen item 1, ACE, NLE health + money, and education, whilst 28.9% of the  
404 variance in the clinical MCI score was explained by CERAD and education years. ACE  
405 and NLE did not have any effects on CERAD or the clinical MCI scores. Total effect  
406 analyses showed that ACE ( $t=3.65$ ,  $p<0.001$ ), NLE health+money ( $t=5.50$ ,  $p<0.001$ ) were  
407 the most important predictors of the DSOA score, followed at a distance by the clinical  
408 MCI score ( $t=2.38$ ,  $p=0.018$ ) and education ( $t=2.65$ ,  $p=0.008$ ).

409

## 410 **Discussion**

### 411 *Presence of a DSOA dimension in older adults*

412 The primary finding of this research is that we were able to extract one validated  
413 principal component or factor from distress, anxiety, depression, and neuroticism scores  
414 in older adults without major depression and ADL dysfunctions. The positive  
415 contributors to this principal component encompass symptoms of distress (PSS), anxiety  
416 (HADS-A and STAI), depression (HADS-D and TGDS) and neuroticism. Earlier  
417 research conducted by Jirakran, Vasupanrajit, Tunvirachaisakul and Maes<sup>23</sup> revealed that  
418 one principal component or factor could be extracted from anxiety, depression and  
419 neuroticism scores in adults with major depression. Neuroticism has been linked with  
420 mood and anxiety symptoms in both clinical<sup>50</sup> and non-clinical<sup>51-53</sup> research cohorts, as  
421 well as in cross-sectional investigations<sup>54,55</sup>. Individual with increased neuroticism suffer

422 from mood swings, feelings of guilt, anxiety, and depression, and they cope poorly with  
423 psychological stressors<sup>23</sup>.

424 Distress in old age is a common phenomenon and is often linked with a range of  
425 physical and psychological symptoms such as stress, anxiety, melancholy, and  
426 neuroticism<sup>56</sup>. However, these symptoms do not always indicate major depression, which  
427 causes significant distress and impedes daily functioning<sup>57</sup>. Although depression is a  
428 frequent psychiatric disorder in a geriatric population and a substantial risk factor for  
429 disability and mortality, it is inaccurately diagnosed in nearly half of all instances<sup>57</sup>.  
430 Another study showed that the levels of stress, anxiety, depression, and neuroticism are  
431 correlated with symptoms of geriatric discomfort, such as melancholy, fatigue,  
432 ambiguous physical complaints, and withdrawal from activities or social circles<sup>58</sup>.

433 Consequently, the principal component derived here from distress, affective, and  
434 neuroticism scores in older adults without clinical depression and ADL dysfunctions  
435 reflects more a distress or psychological strain score rather than a “clinical depression”  
436 score. Therefore, we labelled this score the “Distress Symptoms of Old Age” (DSOA)  
437 score. As such, this is a new construct indicating that mild subjective distress symptoms  
438 may occur in part of the older adults independently from major depression. The  
439 subclinical symptom domain differs significantly from the behavioral and psychological  
440 symptoms of dementia (BPSD) which may occur in patients with dementia and some  
441 subjects with MCI<sup>56</sup>. The latter symptoms domain encompass delusions, hallucinations,  
442 agitation/aggression, depression/dysphoria, anxiety, euphoria, apathy/indifference,  
443 disinhibition, irritability/lability, aberrant motor behaviour, nocturnal behavioral  
444 disturbances, and irregularities in appetite and eating<sup>56</sup>. It should be added that this study

445 excluded subjects with psychosis, either hallucinations or delusions, agitation, euphoria,  
446 or aberrant behaviours and thus excluded not only patients with major depression but also  
447 subjects with BPSD. This is important as some patients with aMCI may show BPSD <sup>56</sup>.

448 All in all, DSOA is a subclinical symptom domain that emphasizes the presence  
449 of distress, mild affective symptoms, and increased neuroticism scores and thus reflects  
450 mild psychological strain rather than major depression or BPSD.

451

452 *Presence of mild cognitive dysfunction (mCoDy) in older adults.*

453 The second major finding of this study is that we were able to extract one  
454 cognitive dimension (principal component or factor) comprising the MoCa, MMSE,  
455 WLM, and WLR scores and indicating mild cognitive dysfunction (mCoDy). Increasing  
456 mCoDy scores suggest a decline in specific cognitive functions, particularly episodic  
457 memory, as well as a more generalized cognitive decline among older adults.  
458 Importantly, the mCoDy score contains much more information than the binary diagnosis  
459 of MCI (scored as yes or no) and allows a quantitative statistical approach. In addition,  
460 this score shows that some older adults suffer from objective dysfunctions in episodic  
461 memory, and not only from subjective feelings of cognitive impairment.

462 The above findings extend previous papers suggesting that MCI is often  
463 characterized by a significant impairment in episodic memory, which is the ability to  
464 recall specific events, situations, and experiences <sup>59</sup>. Even though episodic memory  
465 impairment is a characteristic of aMCI, not everyone with episodic memory problems  
466 will develop aMCI <sup>59</sup>. Individuals with MCI often exhibit deficits in verbal fluency tasks  
467 <sup>7</sup>, which is the cognitive function involving the ability to retrieve and produce words

468 quickly based on specific criteria, such as a particular letter or a category <sup>60</sup>.  
469 Nevertheless, in our study, the VFT scores could not be combined with the MMSE,  
470 MoCa, WLM and WLR scores into one factor because the loading of VFT scores on the  
471 first factor were much too low. As expected, we found that the mCoDy score was only  
472 partially (19.0%) explained by increasing age and lower levels of education (see also  
473 introduction). This leaves a significant proportion of the variance unexplained.

474 Importantly, in the present study we were unable to detect any correlation  
475 between the quantitative DSOA and mCoDy scores, indicating that both dimensions are  
476 independently from each other. Consequently, the DSOA score represents a novel  
477 subclinical concept even in the absence of a major depressive episode, BPSD and ADL  
478 dysfunctions. Nevertheless, we observed that Petersen's item 1 was correlated with the  
479 DSOA score. This suggests that the subjective perception of cognitive deterioration may  
480 be linked with heightened distress and affective scores in older adults <sup>61</sup>. This may be  
481 explained by the theory that the subjective feeling of cognitive impairment is indeed a  
482 distress for older adults <sup>62-64</sup>.

483

#### 484 *Effects of ACEs on the DSOA and mCoDy*

485 The third major finding of this study is that ACE and NLE (especially health and  
486 money) have a highly significant impact on the DSOA, and no effects at all on the  
487 mCoDy domain scores. ACE and NLE are significant risk factors for depression and  
488 other psychological disorders in adulthood <sup>23,24,65</sup>. Kraaij, Arensman and Spinhoven <sup>27</sup>  
489 reported that almost all NLE have a small but significant association with depression. The  
490 total number of negative life events and everyday problems appeared to have the

491 strongest link with depression<sup>27,66</sup>. Consequently, our results indicate that the DSOA  
492 dimensional score reflects in part the distress that originates from relevant NLE and that  
493 previous ACE may cause together with NLE a much stronger impact on the DSOA score.  
494 As such, the combination of ACE, NLE and subjective feelings of cognitive impairments  
495 are together major predictors of the increasing DSOA scores in older adults. This  
496 perspective acknowledges the impact of negative life experiences (ACE and NLE) on  
497 mental health and proposes that DSOA scores (comprising the neuroticism trait) may be  
498 partly determined by the individual's resilience and coping mechanisms.

499 The final question is then whether DSOA should be regarded either as a  
500 psychopathological dimension or as a human response to environmental stressors, such as  
501 NLE and negative formative experiences. The first viewpoint considers that DSOA are  
502 not a normal part of aging, but rather a sign of pathology that requires treatment or  
503 clinical intervention. On the other hand, if these symptoms are seen as a response to  
504 environmental stressors only, it implies that they are a normal reaction to the challenges  
505 and hardships that an individual has encountered throughout their life. Clinicians could  
506 use the subjective DSOA complaints as a criterium whether psychotherapeutic  
507 intervention is indicated or not. Alternatively, future biomarker research should  
508 determine whether the DSOA have pathway substrates indicative of physiological stress  
509 (e.g., cortisol axis, immune activation, oxidative stress) that should be targeted by novel  
510 treatments.

511 Regarding the mCoDy score, prior research findings may require revision,  
512 because previous suggestions that NLE may accelerate cognitive decline in older adults  
513<sup>12,13</sup> may not be correct after excluding subjects with clinical depression (this study).



514 Also, studies showing that ACE are substantially correlated with cognitive impairments  
515 in older adults<sup>9-11</sup> cannot be confirmed after excluding subjects with major depression  
516 (this study). In this respect, one study reported that ACE had a negative effect on  
517 cognitive function in middle-aged and older adults and that depression mediated this  
518 relationship<sup>23,67</sup>. However, since we excluded individuals with major depression, no such  
519 mediating effects may be observed.

520

### 521 *DSOA and mCoDy clusters*

522 This study's fourth significant finding is that cluster analysis identified three  
523 clusters of people based on mCoDy and DSOA scores and that these classes do not align  
524 with the clinically defined distinction between aMCI and healthy controls. Thus, three  
525 cases diagnosed with aMCI were allocated to the healthy control group, while three  
526 healthy controls were assigned to the aMCI group. In addition, the cluster analysis  
527 uncovered a new cluster that was shaped by DSOA rating scales, and part of the aMCI  
528 cases were allocated to that new cluster. The DSOA cluster included healthy controls  
529 (70.96%) and individuals with aMCI (29.04%). As such, cluster analysis derived two  
530 classes of individuals, a first with DSOA, and another with mCoDy. The first cluster  
531 showed much higher scores on all DSOA rating scales (except TGDS), and the latter  
532 cluster showed lower cognitive scores on MMSE, MoCA, WLM, WLR and VFT.

533 Without computing the DSOA scores and without cluster analysis we would  
534 never have been able to uncover that part of aMCI individuals and “healthy controls”  
535 may be allocated to a DSOA class. Our results indicate that the clinical diagnosis based  
536 on Petersen criteria is overinclusive, as it includes subjects who belong to the DSOA

537 group. The latter cases might be clinical misclassifications, whereby cases with DSOA  
538 may mistakenly be classified as aMCI, presumably because they also exhibit subjective  
539 cognitive symptoms (Petersen item 1), although neuropsychological testing did not show  
540 any objective signs of cognitive decline. In addition, previous papers have demonstrated  
541 that the Petersen criteria are overinclusive<sup>7,8</sup>. As a result, we propose the term “mild  
542 cognitive dysfunction” (mCoDy) as an alternative to the overinclusive aMCI diagnosis,  
543 and the quantitative mCoDy score as a better alternative than the incorrect (as  
544 overinclusive) binary (limited information) aMCI diagnosis.

545 All in all, this study clarified why the diagnosis of aMCI according to the Petersen  
546 criteria is overinclusive, because this diagnosis includes subjects with DSOA who have  
547 subjective feelings of cognitive difficulties but lack objective signs of cognitive decline.

548

#### 549 **Limitations and future research**

550 The current results deserve replication in individuals without clinical depression  
551 and ADL dysfunctions in other countries and cultures. Future research should examine  
552 whether the DSOA and mCoDy scores can be externally validated by any physiological  
553 stress-associated pathways that may impact affect or neurocognition, including immune,  
554 oxidative stress, neurotrophic, and neuroplasticity pathways. In addition, longitudinal  
555 studies are needed to explore long-term outcomes of DSOA.

556

#### 557 **Conclusion**

558 The study concludes that in older adults without major depression and ADL  
559 dysfunctions, mCoDy and DSOA are two distinct dimensions. The DSOA dimensions is

560 influenced by ACE, NLE, and the subjective feeling of cognitive decline, whereas the  
561 mCoDy score is affected by aging and lower education. This distinction is crucial for  
562 understanding and addressing mental health issues in older adults without major  
563 depression. The results also highlight the long-term effects of ACE in early life and NLE  
564 on mental health in older adults. The clinical impact of the current study is that clinicians  
565 should carefully screen older adults for DSOA after excluding a major depressive episode  
566 and BPSD. This may be important for the treatment of DSOA versus mCoDy. While the  
567 former is associated with psychological trauma and psychosocial stressors,  
568 psychotherapeutic interventions may be needed, whereas mCoDy might be treatable  
569 instead with lifestyle interventions, including physical activity<sup>68</sup> and perhaps specific  
570 antioxidant treatments targeting the oxidative stress pathways<sup>69</sup>.

571

#### 572 **Availability of data and materials**

573 The dataset generated during and/or analysed during the current study will be  
574 available from MM upon reasonable request and once the authors have fully exploited the  
575 dataset.

576

#### 577 **Author's contributions**

578 All authors contributed to the paper. MM, CT, and V-LT-C: conceptualization  
579 and study design. V-LT-C and MM: first draft writing. V-LT-C, MM, CT, SH, GN, and  
580 MS: editing. GN, CT and V-LT-C: recruitment of patients. MM and V-LT-C: Statistical  
581 analyses. All authors revised and approved the final draft.

582

583 **Financial support**

584 This research is supported by the Ratchadapisek Sompoch Fund, Faculty of  
585 Medicine, Chulalongkorn University (Grant no. GA66/037); The 90th Anniversary of  
586 Chulalongkorn University Scholarship under the Ratchadapisek Somphot Endowment  
587 Fund (Grant no. GCUGR1125661006D), Thailand. MM received funding from the  
588 Thailand Science Research and Innovation Fund, Chulalongkorn University (Grant no.  
589 HEA663000016), and a Sompoch Endowment Fund, Faculty of Medicine,  
590 Chulalongkorn University (Grant no. RA66/016).

591

592 **Competing interest**

593 MS received honoraria and has been a consultant for AbbVie, Angelini,  
594 Lundbeck, Otsuka. Other authors declare that they have no known competing financial  
595 interests or personal relationships that could have influenced the work reported.

596

597 **Institutional Review Board Statement**

598 This study was approved by the Institutional Review Board (IRB) of the Faculty  
599 of Medicine, Chulalongkorn University, Bangkok, Thailand (IRB no. 0372/65), which  
600 complies with the International Guideline for Human Research Protection as required by  
601 the Declaration of Helsinki.

602

603 **Informed consent**

604 Before taking part in the study, all participants and/or their caregivers provided  
605 written informed consent.

606

## 607 **References**

- 608 1. Anderson ND. State of the science on mild cognitive impairment (MCI). *CNS Spectrums*.  
609 2019;24(1):78-87.
- 610 2. Dwolatzky T, Whitehead V, Doniger GM, et al. Validity of the Mindstreams™  
611 computerized cognitive battery for mild cognitive impairment. *J Mol Neurosci*. 2004;24:33-44.  
612 doi:<https://doi.org/10.1385/JMN:24:1:033>
- 613 3. Gualtieri CT, Johnson LG. Neurocognitive testing supports a broader concept of mild  
614 cognitive impairment. *Am J Alzheimers Dis Other Demen*. Nov-Dec 2005;20(6):359-66.  
615 doi:10.1177/153331750502000607
- 616 4. Hemrungronj S, Tangwongchai S, Charoenboon T, et al. Use of the Montreal Cognitive  
617 Assessment Thai Version to Discriminate Amnesic Mild Cognitive Impairment from Alzheimer's  
618 Disease and Healthy Controls: Machine Learning Results. *Dementia and Geriatric Cognitive  
619 Disorders*. 2021;50(2):183-194. doi:10.1159/000517822
- 620 5. Petersen RC, Aisen PS, Beckett LA, et al. Alzheimer's Disease Neuroimaging Initiative  
621 (ADNI): clinical characterization. *Neurology*. Jan 19 2010;74(3):201-209.  
622 doi:10.1212/WNL.0b013e3181cb3e25
- 623 6. Fillenbaum GG, van Belle G, Morris JC, et al. Consortium to Establish a Registry for  
624 Alzheimer's Disease (CERAD): the first twenty years. *Alzheimer's & Dementia*. 2008;4(2):96-109.  
625 doi:<https://doi.org/10.1016/j.jalz.2007.08.005>
- 626 7. Tunvirachaisakul C, Supasitthumrong T, Tangwongchai S, et al. Characteristics of mild  
627 cognitive impairment using the Thai version of the consortium to establish a registry for  
628 Alzheimer's disease tests: a multivariate and machine learning study. *Dementia and Geriatric  
629 Cognitive Disorders*. 2018;45(1):38-48. doi:10.1159/000487232
- 630 8. Tran-Chi V-L, Amrapala A, Nantachai G, Hemrungronj S, Tunvirachaisakul C, Maes M.  
631 Cognitive features of amnesic Mild Cognitive Impairment using specific Cambridge  
632 Neuropsychological Test Automated Battery test scores. *medRxiv*. 2022:1-35.  
633 doi:<https://doi.org/10.1101/2022.06.09.22276176>
- 634 9. Petkus AJ, Lenze EJ, Butters MA, Twamley EW, Wetherell JL. Childhood trauma is  
635 associated with poorer cognitive performance in older adults. *The Journal of Clinical Psychiatry*.  
636 2017;79(1):1-14. doi:<https://doi.org/10.4088/JCP.16m11021>
- 637 10. Ritchie K, Jaussent I, Stewart R, et al. Adverse childhood environment and late-life  
638 cognitive functioning. *International Journal of Geriatric Psychiatry*. 2011;26(5):503-510.  
639 doi:<https://doi.org/10.1002/gps.2553>
- 640 11. Wang L, Yang L, Yu L, et al. Childhood physical neglect promotes development of mild  
641 cognitive impairment in old age—A case-control study. *Psychiatry Res*. 2016;242:13-18.  
642 doi:<https://doi.org/10.1016/j.psychres.2016.04.090>
- 643 12. Rosnick CB, Small BJ, McEvoy CL, Borenstein AR, Mortimer JA. Negative life events and  
644 cognitive performance in a population of older adults. *Journal of Aging and Health*.  
645 2007;19(4):612-629. doi:<https://doi.org/10.1177/0898264307300975>
- 646 13. Nilaweera D, Gurvich C, Freak-Poli R, et al. Adverse events in older adults and the risk of  
647 dementia and cognitive decline. *Journal of Affective Disorders Reports*. 2023;13:1-8.  
648 doi:<https://doi.org/10.1016/j.jadr.2023.100592>
- 649 14. Solmi M, Veronese N, Galvano D, et al. Factors associated with loneliness: an umbrella  
650 review of observational studies. *J Affective Disord*. 2020;271:131-138.  
651 doi:<https://doi.org/10.1016/j.jad.2020.03.075>
- 652 15. Byers AL, Yaffe K. Depression and risk of developing dementia. *Nature Reviews  
653 Neurology*. 2011;7(6):323-331. doi:<https://doi.org/10.1038/nrneurol.2011.60>
- 654 16. Arango C, Dragioti E, Solmi M, et al. Risk and protective factors for mental disorders  
655 beyond genetics: an evidence-based atlas. *World Psychiatry*. 2021;20(3):417-436.  
656 doi:<https://doi.org/10.1002/wps.20894>

- 657 17. de Pablo GS, Solmi M, Vaquerizo-Serrano J, et al. Primary prevention of depression: an  
658 umbrella review of controlled interventions. *J Affective Disord.* 2021;294:957-970.  
659 doi:<https://doi.org/10.1016/j.jad.2021.07.101>
- 660 18. Dragioti E, Radua J, Solmi M, et al. Global population attributable fraction of potentially  
661 modifiable risk factors for mental disorders: a meta-umbrella systematic review. *Mol Psychiatry.*  
662 2022;27(8):3510-3519. doi:<https://doi.org/10.1038/s41380-022-01586-8>
- 663 19. Ma L. Depression, anxiety, and apathy in mild cognitive impairment: current perspectives.  
664 *Frontiers in Aging Neuroscience.* 2020;12:1-8. doi:<https://doi.org/10.3389/fnagi.2020.00009>
- 665 20. Ismail Z, Elbayoumi H, Fischer CE, et al. Prevalence of depression in patients with mild  
666 cognitive impairment: a systematic review and meta-analysis. *JAMA Psychiatry.* 2017;74(1):58-  
667 67. doi:<https://dx.doi.org/10.1001/jamapsychiatry.2016.3162>
- 668 21. Fiske A, Gatz M, Pedersen NL. Depressive symptoms and aging: the effects of illness  
669 and non-health-related events. *The Journals of Gerontology Series B: Psychological Sciences*  
670 *and Social Sciences.* 2003;58(6):320-328. doi:<https://doi.org/10.1093/geronb/58.6.P320>
- 671 22. Kosciuszko M, Steptoe A, Ajnakina O. Genetic propensity, socioeconomic status, and  
672 trajectories of depression over a course of 14 years in older adults. *Transl Psychiatry.*  
673 2023;13(1):1-8. doi:<https://doi.org/10.1038/s41398-023-02367-9>
- 674 23. Jirakran K, Vasupanrajit A, Tunvirachaisakul C, Maes M. The effects of adverse  
675 childhood experiences on depression and suicidal behaviors are partially mediated by  
676 neuroticism: A subclinical manifestation of major depression. *Frontiers in Psychiatry.* 2023;14:1-  
677 13. doi:<https://doi.org/10.3389/fpsy.2023.1158036>
- 678 24. Maes M, Almulla AF. Research and diagnostic algorithmic rules (radar) and radar plots  
679 for the first episode of major depressive disorder: effects of childhood and recent adverse  
680 experiences on suicidal behaviors, Neurocognition and phenome features. *Brain Sci.*  
681 2023;13(5):1-20. doi:<https://doi.org/10.3390/brainsci13050714>
- 682 25. Cheong EV, Sinnott C, Dahly D, Kearney PM. Adverse childhood experiences (ACEs)  
683 and later-life depression: perceived social support as a potential protective factor. *BMJ Open.*  
684 2017;7(9):1-11. doi:<http://dx.doi.org/10.1136/bmjopen-2016-013228>
- 685 26. Cairney J, Krause N. Negative life events and age-related decline in mastery: Are older  
686 adults more vulnerable to the control-eroding effect of stress? *The Journals of Gerontology Series*  
687 *B: Psychological Sciences and Social Sciences.* 2008;63(3):162-170.  
688 doi:<https://doi.org/10.1093/geronb/63.3.S162>
- 689 27. Kraaij V, Arensman E, Spinhoven P. Negative life events and depression in elderly  
690 persons: a meta-analysis. *The Journals of Gerontology Series B: Psychological Sciences and*  
691 *Social Sciences.* 2002;57(1):87-94. doi:<https://doi.org/10.1093/geronb/57.1.P87>
- 692 28. Maes M. Psychological stress, cytokines and the inflammatory response system. *Current*  
693 *Opinion in Psychiatry.* 1999;12(6):695-700.
- 694 29. Maes M. Psychological stress and the inflammatory response system. *Clin Sci.*  
695 2001;101(2):193-194.
- 696 30. Li J, Lin S, Pei L. Adverse Childhood Experiences and Depressive Symptoms  
697 Trajectories Among Middle-Aged and Elderly—China, 2011–2018. *China CDC Weekly.*  
698 2022;4(27):588. doi:<https://doi.org/10.46234/ccdcw2022.129>
- 699 31. Petersen RC. Mild cognitive impairment as a diagnostic entity. *J Intern Med (GBR).*  
700 2004;256(3):183-194. doi:<https://doi.org/10.1111/j.1365-2796.2004.01388.x>
- 701 32. Committee TtBF. Thai Mental State Examination (TMSE). 1993;
- 702 33. Tangwongchai S, Phanasathit M, Chareemboon T, et al. The validity of thai version of the  
703 montreal cognitive assessment (MoCA-T). *Dement Neuropsychol.* 2009;3(2):172.
- 704 34. Folstein MF, Folstein SE, McHugh PR. "Mini-mental state". A practical method for  
705 grading the cognitive state of patients for the clinician. *Journal of Psychiatric Research.* Nov  
706 1975;12(3):189-98. doi:10.1016/0022-3956(75)90026-6
- 707 35. Nasreddine ZS, Phillips NA, Bédirian V, et al. The Montreal Cognitive Assessment,  
708 MoCA: a brief screening tool for mild cognitive impairment. *Journal of the American Geriatrics*  
709 *Society.* 2005;53(4):695-699. doi:10.1111/j.1532-5415.2005.53221.x
- 710 36. Yomaboot P, Cooper AJ. Factor structure and psychometric properties of the  
711 International Personality Item Pool-NEO (IPIP-NEO) Thai version. *Journal of Somdet Chaopraya*  
712 *Institute of Psychiatry.* 2016;10(2):36-49.

- 713 37. Cohen S, Williamson GM. Stress and infectious disease in humans. *Psychol Bull.*  
714 1991;109(1):5-24. doi:<https://doi.org/10.1037/0033-2909.109.1.5>
- 715 38. Wongpakaran N, Wongpakaran T. The Thai version of the PSS-10: An Investigation of its  
716 psychometric properties. *BioPsychoSocial medicine.* 2010;4:1-6.
- 717 39. Maybery D, Neale J, Arentz A, Jones-Ellis J. The Negative Event Scale: Measuring  
718 frequency and intensity of adult hassles. *Anxiety, stress, and coping.* 2007;20(2):163-176.
- 719 40. Boonyamalik P. *Epidemiology of adolescent suicidal ideation: Roles of perceived life*  
720 *stress, depressive symptoms, and substance use.* The Johns Hopkins University; 2005.
- 721 41. Spielberger CD, Gorsuch R, Lushene R, Vagg P, Jacobs G. Manual for the state-trait  
722 anxiety scale. *Consulting Psychologists.* 1983;
- 723 42. Iamsupasit S, Phumivuthisarn P. A study of cognitive factors related to anxiety sensitivity.  
724 *Proceedings of the East-West Psychology Science Research Center, Bangkok, Thailand.* 2005;
- 725 43. Zigmond AS, Snaith RP. The hospital anxiety and depression scale. *Acta Psychiatrica*  
726 *Scandinavica.* 1983;67(6):361-370. doi:<https://doi.org/10.1111/j.1600-0447.1983.tb09716.x>
- 727 44. Nilchaikovit T. Development of Thai version of hospital anxiety and depression scale in  
728 cancer patients. *J Psychiatr Assoc Thai.* 1996;4:18-30.
- 729 45. Yesavage JA. Imagery pretraining and memory training in the elderly. *Gerontology.*  
730 1983;29(4):271-275.
- 731 46. Pongvarin N, Committee TTBF. Thai geriatric depression scale-TGDS. *Siriraj Hospital*  
732 *Gaz.* 1994;46:1-9.
- 733 47. Krishnamoorthy Y, Rajaa S, Rehman T. Diagnostic accuracy of various forms of geriatric  
734 depression scale for screening of depression among older adults: Systematic review and meta-  
735 analysis. *Arch Gerontol Geriatr.* 2020;87:2-11. doi:<https://doi.org/10.1016/j.archger.2019.104002>
- 736 48. Felitti VJ, Anda RF, Nordenberg D, et al. Relationship of childhood abuse and household  
737 dysfunction to many of the leading causes of death in adults: The Adverse Childhood  
738 Experiences (ACE) Study. *American Journal of Preventive Medicine.* 1998;14(4):245-258.  
739 doi:[https://doi.org/10.1016/S0749-3797\(98\)00017-8](https://doi.org/10.1016/S0749-3797(98)00017-8)
- 740 49. Rungmueanporn L, Buathong N, Chandarasiri P, Wittayasai W. Development of the  
741 adverse childhood experiences (ACE) questionnaire Thai version. *Chulalongkorn Medical*  
742 *Bulletin.* 2019;1(3):251-260. doi:<https://doi.org/10.14456/chulamedbull.2019.21>
- 743 50. Malouff JM, Thorsteinsson EB, Schutte NS. The relationship between the five-factor  
744 model of personality and symptoms of clinical disorders: A meta-analysis. *Journal of*  
745 *Psychopathology and Behavioral Assessment.* 2005;27:101-114.  
746 doi:<https://doi.org/10.1007/s10862-005-5384-y>
- 747 51. Jylhä P, Isometsä E. The relationship of neuroticism and extraversion to symptoms of  
748 anxiety and depression in the general population. *Depression and Anxiety.* 2006;23(5):281-289.  
749 doi:<https://doi.org/10.1002/da.20167>
- 750 52. Saklofske D, Kelly I, Janzen B. Neuroticism, depression, and depression proneness.  
751 *Personality and Individual Differences.* 1995;18(1):27-31. doi:[https://doi.org/10.1016/0191-](https://doi.org/10.1016/0191-8869(94)00128-F)  
752 [8869\(94\)00128-F](https://doi.org/10.1016/0191-8869(94)00128-F)
- 753 53. Uliaszek AA, Hauner KK, Zinbarg RE, et al. An examination of content overlap and  
754 disorder-specific predictions in the associations of neuroticism with anxiety and depression.  
755 *Journal of Research in Personality.* 2009;43(5):785-794.  
756 doi:<https://doi.org/10.1016/j.jrp.2009.05.009>
- 757 54. Griffith JW, Zinbarg RE, Craske MG, et al. Neuroticism as a common dimension in the  
758 internalizing disorders. *Psychological Medicine.* 2010;40(7):1125-1136.  
759 doi:<https://doi.org/10.1017/S0033291709991449>
- 760 55. Kotov R, Gamez W, Schmidt F, Watson D. Linking “big” personality traits to anxiety,  
761 depressive, and substance use disorders: a meta-analysis. *Psychol Bull.* 2010;136(5):768-821.  
762 doi:<https://doi.org/10.1037/a0020327>
- 763 56. Hemrungronj S, Tangwongchai S, Charernboon T, et al. Cognitive impairments predict  
764 the behavioral and psychological symptoms of dementia. *Frontiers in Neurology.* 2023;14:1-9.  
765 doi:<https://doi.org/10.3389/fneur.2023.1194917>
- 766 57. Zenebe Y, Akele B, Necho M. Prevalence and determinants of depression among old  
767 age: a systematic review and meta-analysis. *Annals of General Psychiatry.* 2021;20(1):1-19.  
768 doi:<https://doi.org/10.1186/s12991-021-00375-x>

- 769 58. Fabbri C, Mutz J, Lewis CM, Serretti A. Depressive symptoms and neuroticism-related  
770 traits are the main factors associated with wellbeing independent of the history of lifetime  
771 depression in the UK Biobank. *Psychological Medicine*. 2023;53(7):3000-3008.  
772 doi:<https://doi.org/10.1017/S003329172100502X>
- 773 59. Chatzikostopoulos A, Moraitou D, Tsolaki M, et al. Episodic Memory in Amnesic Mild  
774 Cognitive Impairment (aMCI) and Alzheimer's Disease Dementia (ADD): Using the "Doors and  
775 People" Tool to Differentiate between Early aMCI—Late aMCI—Mild ADD Diagnostic Groups.  
776 *Diagn*. 2022;12(7):1768.
- 777 60. Cottingham ME, Hawkins KA. Verbal fluency deficits co-occur with memory deficits in  
778 geriatric patients at risk for dementia: Implications for the concept of mild cognitive impairment.  
779 *Behavioural Neurology*. 2009;22(3-4):73-79. doi:<https://doi.org/10.3233/ben-2009-0246>
- 780 61. Chapman S, Weiss D, Broulíková HM, et al. Examining the role of aging perceptions in  
781 subjective cognitive decline. *Alzheimer Disease & Associated Disorders*. 2022;36(4):288-294.  
782 doi:<https://doi.org/10.1097/WAD.0000000000000518>
- 783 62. Sunderland M, Hobbs MJ, Anderson TM, Andrews G. Psychological distress across the  
784 lifespan: examining age-related item bias in the Kessler 6 Psychological Distress Scale.  
785 *International Psychogeriatrics*. 2012;24(2):231-242.  
786 doi:<https://doi.org/10.1017/S1041610211001852>
- 787 63. Gondek D, Bann D, Patalay P, et al. Psychological distress from early adulthood to early  
788 old age: evidence from the 1946, 1958 and 1970 British birth cohorts. *Psychological Medicine*.  
789 2022;52(8):1471-1480. doi:<https://doi.org/10.1017/S003329172000327X>
- 790 64. Moustaka K, Nega C, Beratis IN. Exploring the Impact of Age of Onset of Mild Cognitive  
791 Impairment on the Profile of Cognitive and Psychiatric Symptoms. *Geriatrics*. 2023;8(5):96.  
792 doi:<https://doi.org/10.3390/geriatrics8050096>
- 793 65. Fang M. *The effect of adverse childhood experiences on depression symptoms among*  
794 *older adults in China*. University of Waterloo; 2019.
- 795 66. Almulla AF, Abo Algon AA, Maes MF. Adverse childhood experiences and recent  
796 negative events activate immune and growth factor pathways, which are associated with first  
797 episode major depression and suicidal behaviours. *medRxiv*. 2023:1-47.  
798 doi:<https://doi.org/10.1101/2023.06.19.23291597>
- 799 67. Wang G, Zhou Y, Duan J, Kan Q, Cheng Z, Tang S. Effects of adverse childhood health  
800 experiences on cognitive function in Chinese middle-aged and older adults: mediating role of  
801 depression. *BMC Public Health*. 2023;23(1):1-16. doi:<https://doi.org/10.1186/s12889-023-16169-7>
- 802 68. Veronese N, Soysal P, Demurtas J, et al. Physical activity and exercise for the prevention  
803 and management of mild cognitive impairment and dementia: a collaborative international  
804 guideline. *European geriatric medicine*. 2023:1-28.
- 805 69. Nantachai G, Vasupanrajit A, Tunvirachaisakul C, Solmi M, Maes M. Oxidative stress and  
806 antioxidant defenses in mild cognitive impairment: a systematic review and meta-analysis. *Ageing*  
807 *Research Reviews*. 2022:101639. doi:10.1016/j.arr.2022.101639  
808



809 **Table 1.** Results of principal component analyses (PCA)

| PCA#1: DSOA score |          | PCA#2: mCoDy score |          | PCA#3: qMCI score |          |
|-------------------|----------|--------------------|----------|-------------------|----------|
| Variables         | Loadings | Variables          | Loadings | Variables         | Loadings |
| Neuroticism       | 0.733    | MoCA               | 0.748    | MoCa              | 0.930    |
| PSS               | 0.821    | MMSE               | 0.706    | MMSE              | 0.774    |
| HADS-A            | 0.856    | WLR                | 0.761    | CDR               | 0.920    |
| HADS-D            | 0.699    | WLM                | 0.702    |                   |          |
| STAI              | 0.852    |                    |          |                   |          |
| TGDS              | 0.670    |                    |          |                   |          |
| KMO               | 0.874    | KMO                | 0.613    | KMO               | 0.656    |
| $\chi^2$          | 314.218  | $\chi^2$           | 109.867  | $\chi^2$          | 199.487  |
| df                | 15       | df                 | 6        | df                | 3        |
| p                 | <0.001   | p                  | <0.001   | p                 | <0.001   |
| VE                | 60.14    | VE                 | 53.23    | VE                | 77.02    |
| Cronbach's alpha  | 0.837    | Cronbach's alpha   | 0.668    | Cronbach's alpha  | 0.662    |

810

811 KMO, Kaiser-Meyer-Olkin measure of sampling adequacy;  $\chi^2$ , Bartlett's test; df, degree of freedom; p, p-value; VE, variance  
 812 explained.

813 **Abbreviations:** DSOA, distress symptoms of old age; mCoDy, mild cognitive dysfunction; qMCI, quantitative MCI (mild cognitive  
 814 impairment); PSS, Perceived Stress Scale; HADS-A, Hospital Anxiety and Depression Scale-Anxiety; HADS-D, Hospital Anxiety  
 815 and Depression Scale-Depression, STAI, State-Trait Anxiety Inventory; GDS, Geriatric Depression Scale; MoCA, Montreal Cognitive

816 Assessment; MMSE, Mini-Mental State Examination; WLM, Word List Memory, WLR, Word List Recognition; CDR, Clinical  
817 Dementia Rating.  
818

819 **Table 2.** Socio-demographic and clinical data in three clusters of old adults: those with distress symptoms of old age (DSOA), those  
 820 with mild cognitive dysfunction (mCoDy), and those without mCoDy/DSOA (controls).

| Variables         | Cluster 1<br>Controls (n=37) <sup>a</sup> | Cluster 2<br>DSOA (n=31) <sup>b</sup> | Cluster 3<br>mCoDy (n=52) <sup>c</sup> | <i>F/χ<sup>2</sup></i> | <i>df</i> | <i>p</i> |
|-------------------|-------------------------------------------|---------------------------------------|----------------------------------------|------------------------|-----------|----------|
| Age – years       | 66.4 (4.5) <sup>c</sup>                   | 67.0 (4.0) <sup>c</sup>               | 69.2 (3.4) <sup>a,b</sup>              | 6.14                   | 2/117     | 0.003    |
| Sex – F/M         | 31/6                                      | 20/11                                 | 39/13                                  | 3.34                   | 2         | 0.188    |
| Education – years | 15.78 (3.20) <sup>c</sup>                 | 16.81 (1.37) <sup>c</sup>             | 12.98 (4.54) <sup>a,b</sup>            | 13.13                  | 2/117     | <0.001   |
| S/M/D             | 8/25/4                                    | 9/17/5                                | 11/34/7                                | FFHET                  | -         | 0.835    |
| HC/aMCI           | 34/3                                      | 22/9                                  | 3/49                                   | 72.10                  | 2         | <0.001   |
| Neuroticism       | 11.54 (2.95) <sup>b,c</sup>               | 17.45 (3.85) <sup>a</sup>             | 16.27 (5.30) <sup>a</sup>              | 18.96                  | 2/117     | <0.001   |
| PSS               | 8.62 (5.36) <sup>b,c</sup>                | 17.35 (3.51) <sup>a,c</sup>           | 14.92 (5.68) <sup>a,b</sup>            | 27.69                  | 2/117     | <0.001   |
| HADS Anxiety      | 2.86 (1.37) <sup>b,c</sup>                | 6.97 (2.33) <sup>a,c</sup>            | 5.31 (2.98) <sup>a,b</sup>             | 25.10                  | 2/117     | <0.001   |
| HADS Depression   | 1.81 (1.77) <sup>b,c</sup>                | 6.74 (3.54) <sup>a,c</sup>            | 4.50 (3.76) <sup>a,b</sup>             | 20.03                  | 2/117     | <0.001   |
| STAI              | 31.22 (5.35) <sup>b,c</sup>               | 43.13 (4.87) <sup>a,c</sup>           | 36.77 (8.55) <sup>a,b</sup>            | 25.57                  | 2/117     | <0.001   |
| TGDS              | 3.05 (2.05) <sup>b,c</sup>                | 5.58 (3.96) <sup>a,c</sup>            | 6.40 (4.65) <sup>a,b</sup>             | 8.47                   | 2/117     | <0.001   |
| DSOA (z score)    | -0.889 (0.465) <sup>b,c</sup>             | 0.735 (0.560) <sup>a,c</sup>          | 0.132 (0.933) <sup>a,b</sup>           | 44.72                  | 2/116     | <0.001   |
| VFT               | 24.59 (4.92) <sup>c</sup>                 | 23.94 (4.72) <sup>c</sup>             | 19.75 (5.77) <sup>a,b</sup>            | 11.13                  | 2/117     | <0.001   |
| WLM               | 22.19 (3.58) <sup>c</sup>                 | 20.61 (3.90) <sup>c</sup>             | 18.98 (4.30) <sup>a,b</sup>            | 7.07                   | 2/117     | 0.001    |
| WLR               | 7.11 (2.03) <sup>c</sup>                  | 6.71 (1.53) <sup>c</sup>              | 5.17 (2.44) <sup>a,b</sup>             | 10.47                  | 2/117     | <0.001   |
| MoCA              | 27.49 (1.78) <sup>b,c</sup>               | 26.06 (1.98) <sup>a,c</sup>           | 22.19 (1.80) <sup>a,b</sup>            | 98.21                  | 2/117     | <0.001   |
| MMSE              | 28.62 (1.32) <sup>c</sup>                 | 28.74 (1.06) <sup>c</sup>             | 26.00 (2.20) <sup>a,b</sup>            | 35.87                  | 2/117     | <0.001   |
| mCoDy (z score)   | -1.334 (1.074) <sup>c</sup>               | -0.812 (1.038) <sup>c</sup>           | 2.068 (1.288) <sup>a,b</sup>           | 110.56                 | 2/117     | <0.001   |

821

822 Results are shown as mean (standard deviation); <sup>a, b, c</sup>, Pairwise comparison among group means; F/  $\chi^2$ , Results of analyses of variance  
823 (F) or analyses of contingency analyses ( $\chi^2$ ); df, degree of freedom; p, p-value.

824 **Abbreviations:** HC/aMCI, our primary diagnosis into healthy controls/amnestic mild cognitive impairment, S/M/D: single / married /  
825 divorced (separated), DSOA, distress symptoms of old age; mCoDy, mild cognitive dysfunction; PSS, Perceived Stress Scale; HADS,  
826 Hospital Anxiety and Depression Scale; STAI, State-Trait Anxiety Inventory; TGDS, Thai Geriatric Depression Scale; VFT, Verbal  
827 Fluency Task; WLM, Word List Memory; WLR, Word List Recognition; MoCA, Montreal Cognitive Assessment; MMSE, Mini-  
828 Mental State Examination.

829

830 **Table 3.** Adverse childhood experiences (ACE) and negative life events (NLE) in three clusters of old adults: those with distress  
 831 symptoms of old age (DSOA), those with mild cognitive dysfunction (mCoDy), and those without mCoDy/DSOA (controls).

| Variables             | Controls (n=37) <sup>a</sup> | DSOA (n=31) <sup>b</sup>   | mCoDy (n=52) <sup>c</sup> | F    | df    | p     |
|-----------------------|------------------------------|----------------------------|---------------------------|------|-------|-------|
| ACE                   |                              |                            |                           |      |       |       |
| Emotional abuse       | 0.27 (0.56)                  | 0.42 (0.67)                | 0.35 (0.65)               | 0.47 | 2/117 | 0.624 |
| Physical abuse        | 0.24 (0.49)                  | 0.35 (0.55)                | 0.17 (0.38)               | 1.48 | 2/117 | 0.232 |
| Sexual abuse          | 0.03 (0.16)                  | 0.32 (0.94)                | 0.10 (0.49)               | 2.33 | 2/117 | 0.102 |
| Emotional neglect     | 9.65 (3.67)                  | 11.55 (4.49)               | 11.13 (4.35)              | 2.05 | 2/117 | 0.133 |
| Physical neglect      | 7.19 (2.08) <sup>c</sup>     | 8.10 (4.50)                | 8.60 (2.97) <sup>a</sup>  | 3.18 | 2/117 | 0.045 |
| Sum 5 ACEs (z scores) | -0.310 (0.991) <sup>b</sup>  | 0.318 (1.001) <sup>a</sup> | 0.035 (0.968)             | 3.49 | 2/117 | 0.034 |
| Sum neglect           | 16.84 5.06                   | 19.65 6.14                 | 19.73 6.29                | 3.01 | 2/117 | 0.053 |
| NLE                   |                              |                            |                           |      |       |       |
| Total NLE *           | 12.89 (14.21) <sup>b</sup>   | 19.30 (13.73) <sup>a</sup> | 14.92 (13.34)             | 2.72 | 2/115 | 0.070 |
| NLE money+health      | 1.70 (2.72) <sup>b,c</sup>   | 3.70 (3.48) <sup>a</sup>   | 3.13 (3.27) <sup>a</sup>  | 5.95 | 2/116 | 0.003 |

832  
 833 Results are shown as mean (SD); <sup>a, b, c</sup>, Pairwise comparison among group means; F, Results of analyses of variance; df, degree of  
 834 freedom; p, p-value. **Abbreviations:** HC, Healthy Control; DSOA, distress symptoms of old age; mCoDy, mild cognitive dysfunction;  
 835 ACE, Adverse childhood experiences; NLE, Negative Life Events.

836

837 **Table 4.** Results of multiple regression analyses with distress symptoms of old age (DSOA) and mild cognitive dysfunction (mCoDy)  
 838 scores as dependent variables

| Dependent Variables | Explanatory Variables | Coefficients of input variables |       |        | Model statistics |       |       |        |
|---------------------|-----------------------|---------------------------------|-------|--------|------------------|-------|-------|--------|
|                     |                       | $\beta$                         | $t$   | $p$    | $R^2$            | $F$   | $df$  | $p$    |
| #1. DSOA            | <b>Model</b>          |                                 |       |        | 0.328            | 18.36 | 3/116 | <0.001 |
|                     | NLE health+money      | 0.438                           | 5.50  | <0.001 |                  |       |       |        |
|                     | Sum_neglect (ACE)     | 0.257                           | 3.16  | 0.002  |                  |       |       |        |
|                     | Education             | 0.206                           | 2.61  | 0.010  |                  |       |       |        |
| #2. DSOA            | <b>Model</b>          |                                 |       |        | 0.379            | 17.08 | 4/116 | <0.001 |
|                     | NLE health+money      | 0.407                           | 5.26  | <0.001 |                  |       |       |        |
|                     | Sum_neglect (ACE)     | 0.252                           | 3.22  | 0.002  |                  |       |       |        |
|                     | Education             | 0.264                           | 3.37  | 0.001  |                  |       |       |        |
|                     | Petersen item 1       | 0.236                           | 3.40  | 0.003  |                  |       |       |        |
| #3. mCoDy           | <b>Model</b>          |                                 |       |        | 0.190            | 13.59 | 2/116 | <0.001 |
|                     | Education             | -0.246                          | -2.83 | 0.005  |                  |       |       |        |
|                     | Age                   | +0.297                          | +3.41 | <0.001 |                  |       |       |        |

839  
 840 #, number of regression analysis;  $\beta$ , Standardized regression coefficient;  $t$ , t-statistic value;  $R^2$ , Total variance explained;  $F$ , Results of  
 841 analyses of variance;  $df$ , degree of freedom;  $p$ , p-value.  
 842 **Abbreviations:** DSOA, distress symptoms of old age; mCoDy, mild cognitive dysfunction; ACE, Adverse childhood experiences;  
 843 NLE, Negative Life Events; Sum\_neglect, Mental and physical neglect combined.

844 **Figure 1.** Partial regression plot of the mild cognitive dysfunction (mCoDy) score on the distress symptoms of old age (DSOA) score  
845 (p=0.336, after adjustment for sex, age and education).

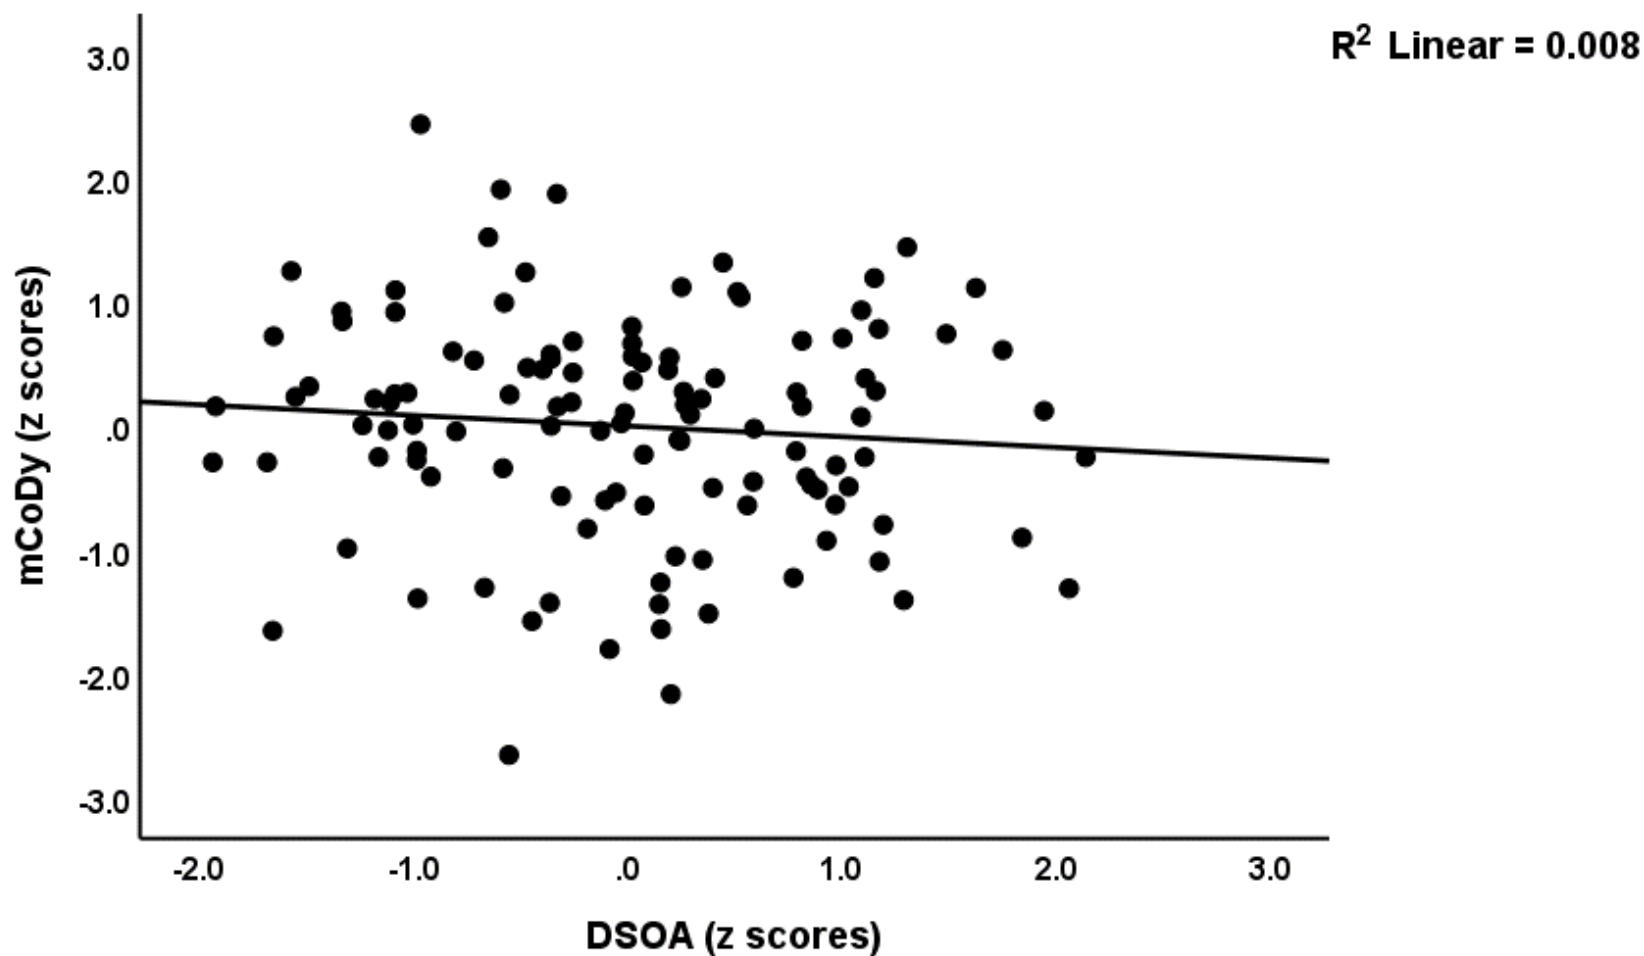

846

847 **Figure 2.** Partial regression plot of the distress symptoms of old age (DSOA) score on negative life events (health + money)  
848 (p<0.001).

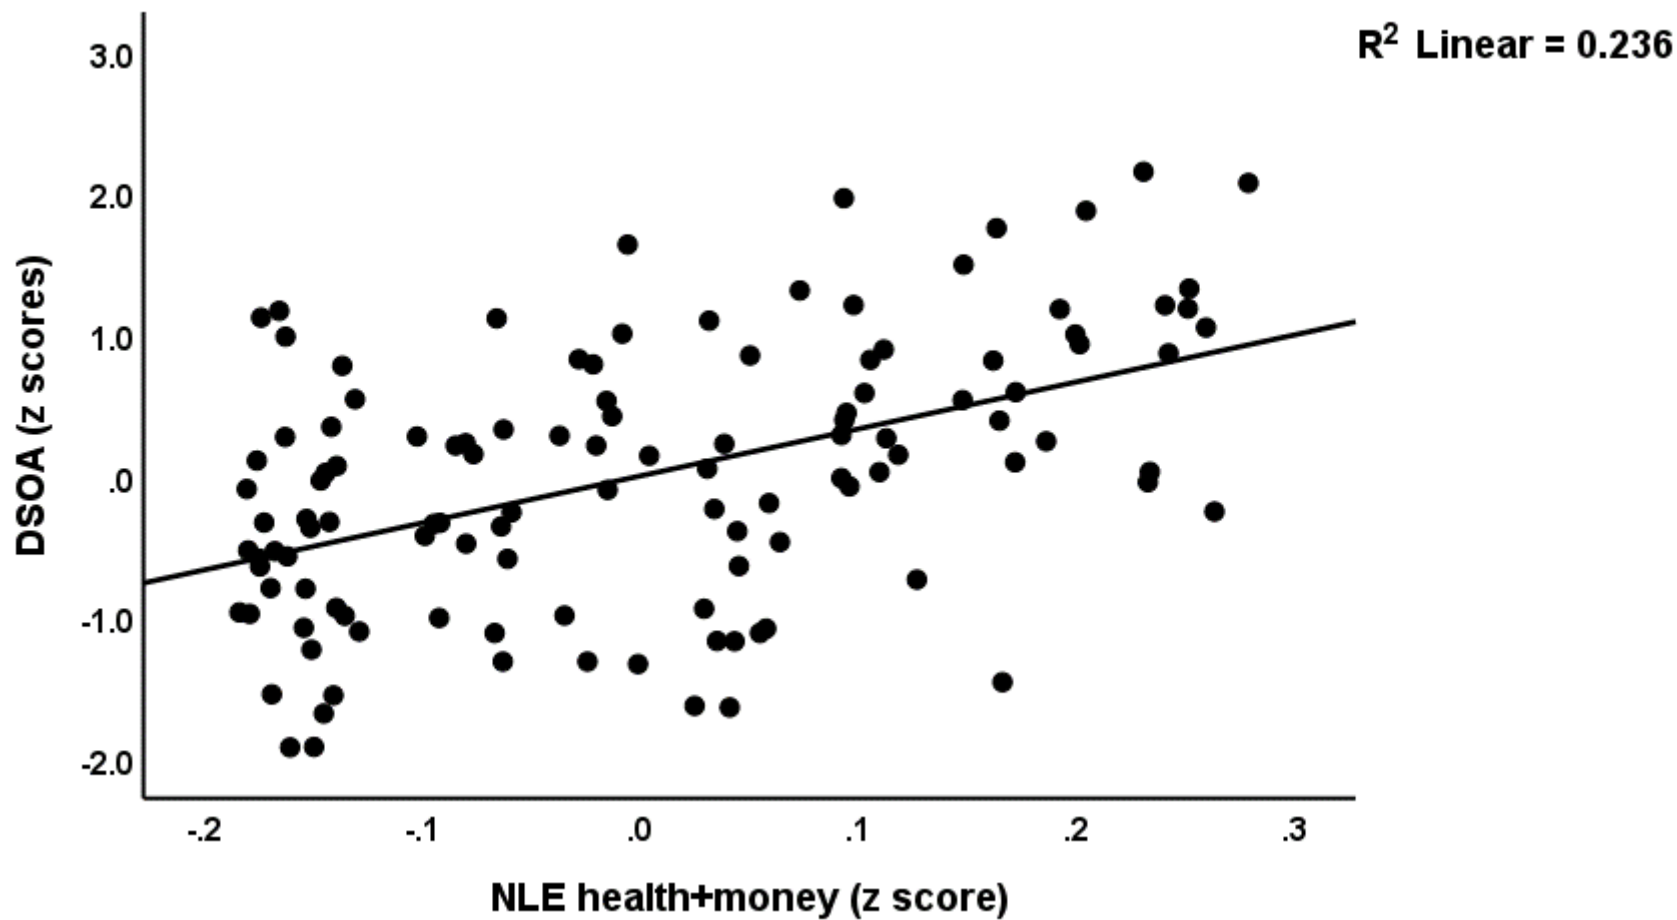

849



850 **Figure 3.** Partial regression plot of the distress symptoms of old age (DSOA) score on ACE physical + emotional neglect (p=0.002).

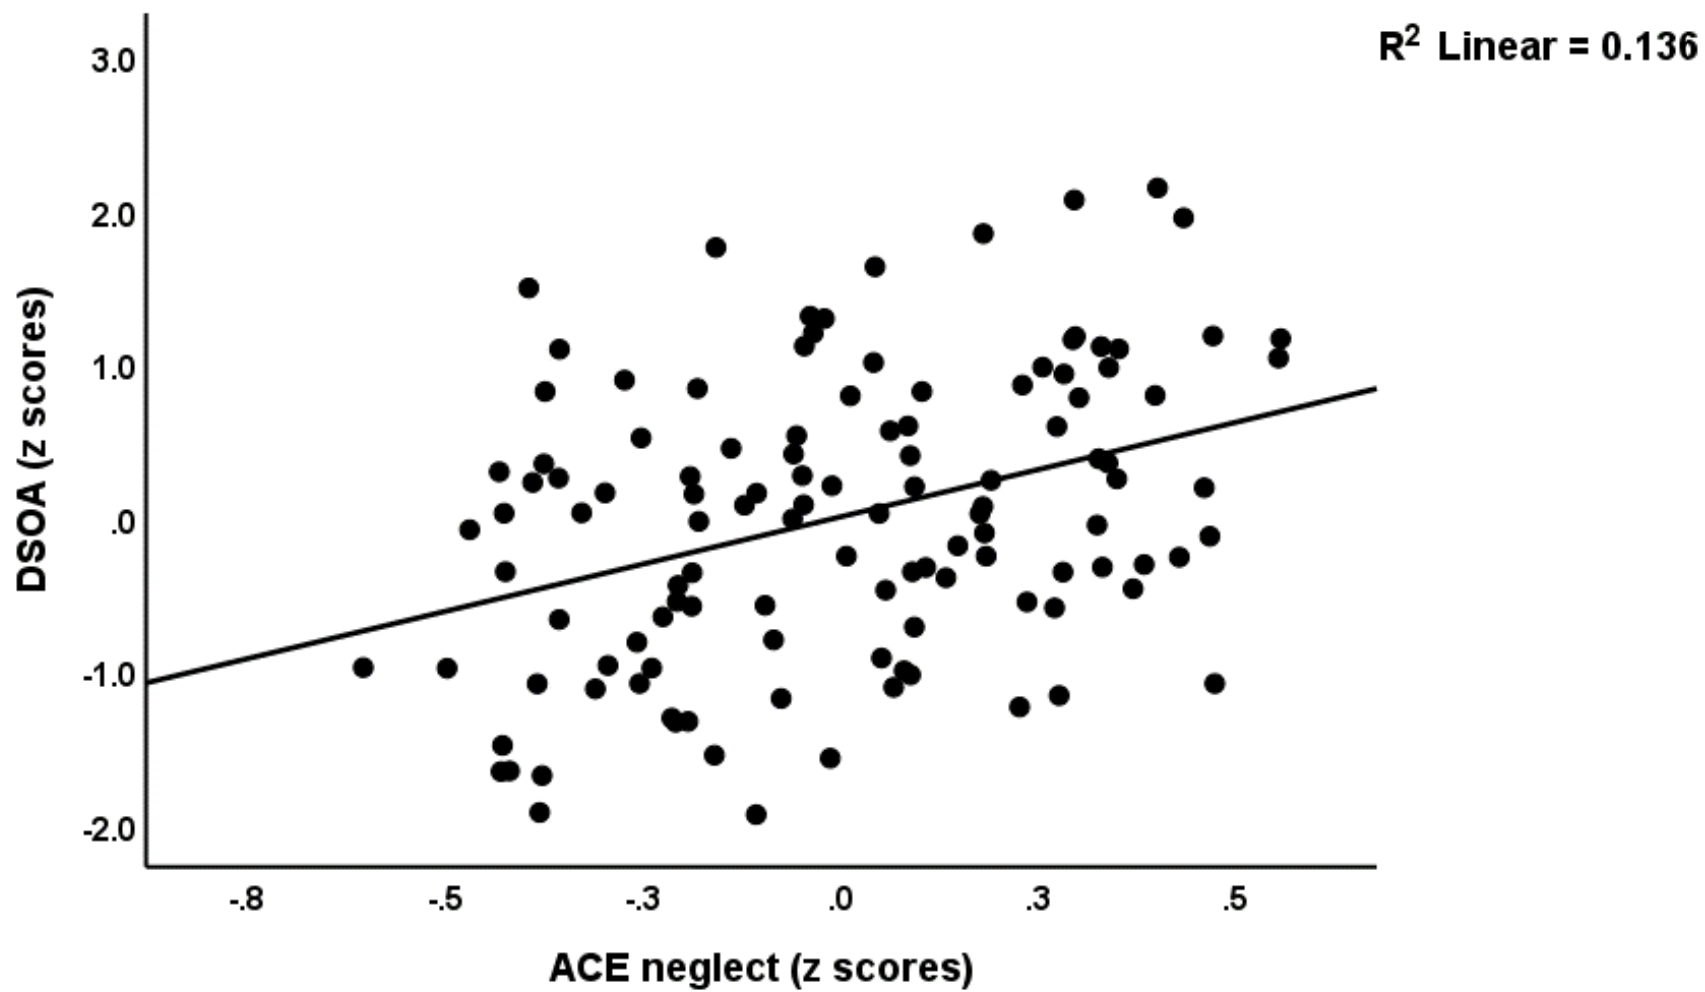

851

852 **Figure 4.** Partial regression plot of the mild cognitive dysfunction score (mCoDy) on education years ( $p < 0.001$ ).

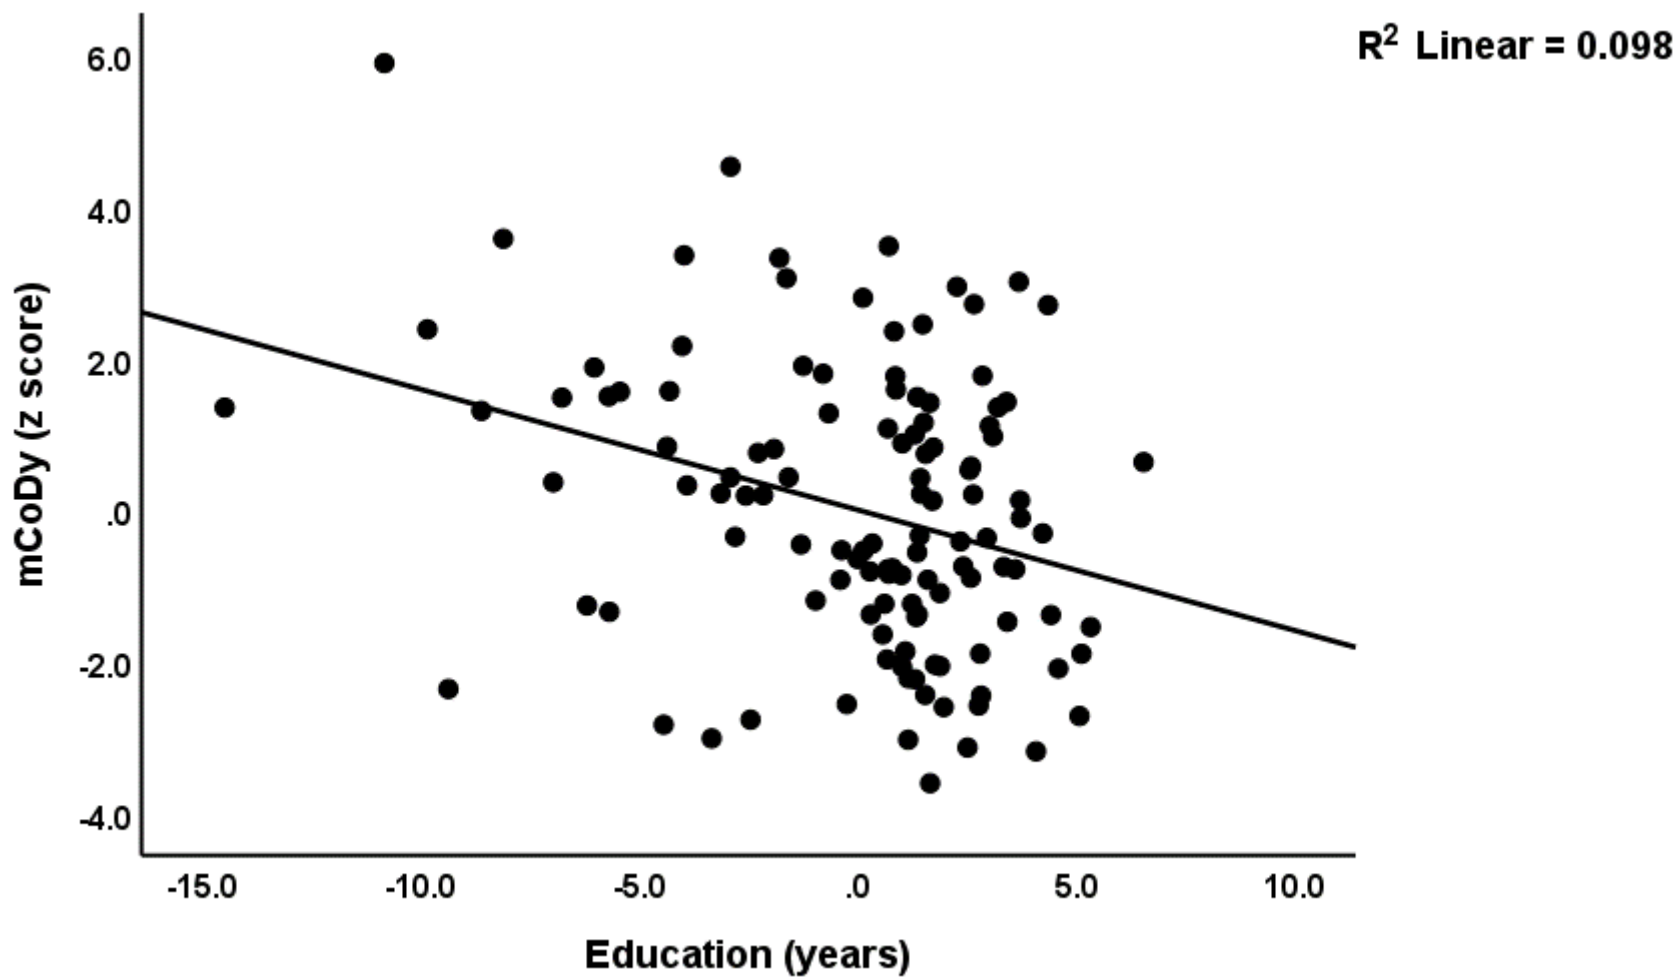

853

854 **Figure 5.** Results of partial least squares analysis.

855 Entered in the analysis are two reflective constructs, namely a) DSOA (distress symptoms of old age) conceptualized as a factor

856 extracted from PSS (Perceived Stress Scale), HADS (Hospital Anxiety and Depression Scale), STAI (State-Trait Anxiety Inventory)

857 and TGDS (Thai Geriatric Depression Scale) scores; and b) qMCI (a quantitative mild cognitive impairment score) conceptualized as

858 a factor extracted from CDR (modified Clinical Dementia Rating), MoCA (Montreal Cognitive Assessment) and MMSE (Mini-

859 Mental State Examination) scores. This model also entered two formative constructs, namely a) objective memory impairment

860 comprising VFT (verbal fluency test), WLM (World List Memory) and WLR (Word List Recognition) scores; and b) ACE (adverse

861 childhood experiences) comprising Em-Abu (emotional abuse), Emo-neglect (emotional neglect), and Phys-neglect (physical neglect).

862 The other variables are entered as single indicators including NES health+money (negative life events due to health and money

863 problems). Shown are the pathway coefficients (with exact p-value). Figures within the circles denote explained variance. Reflective

864 models are specified using loadings (with p-values) on the factors, and the formative models by the weights (p values) of the

865 indicators.

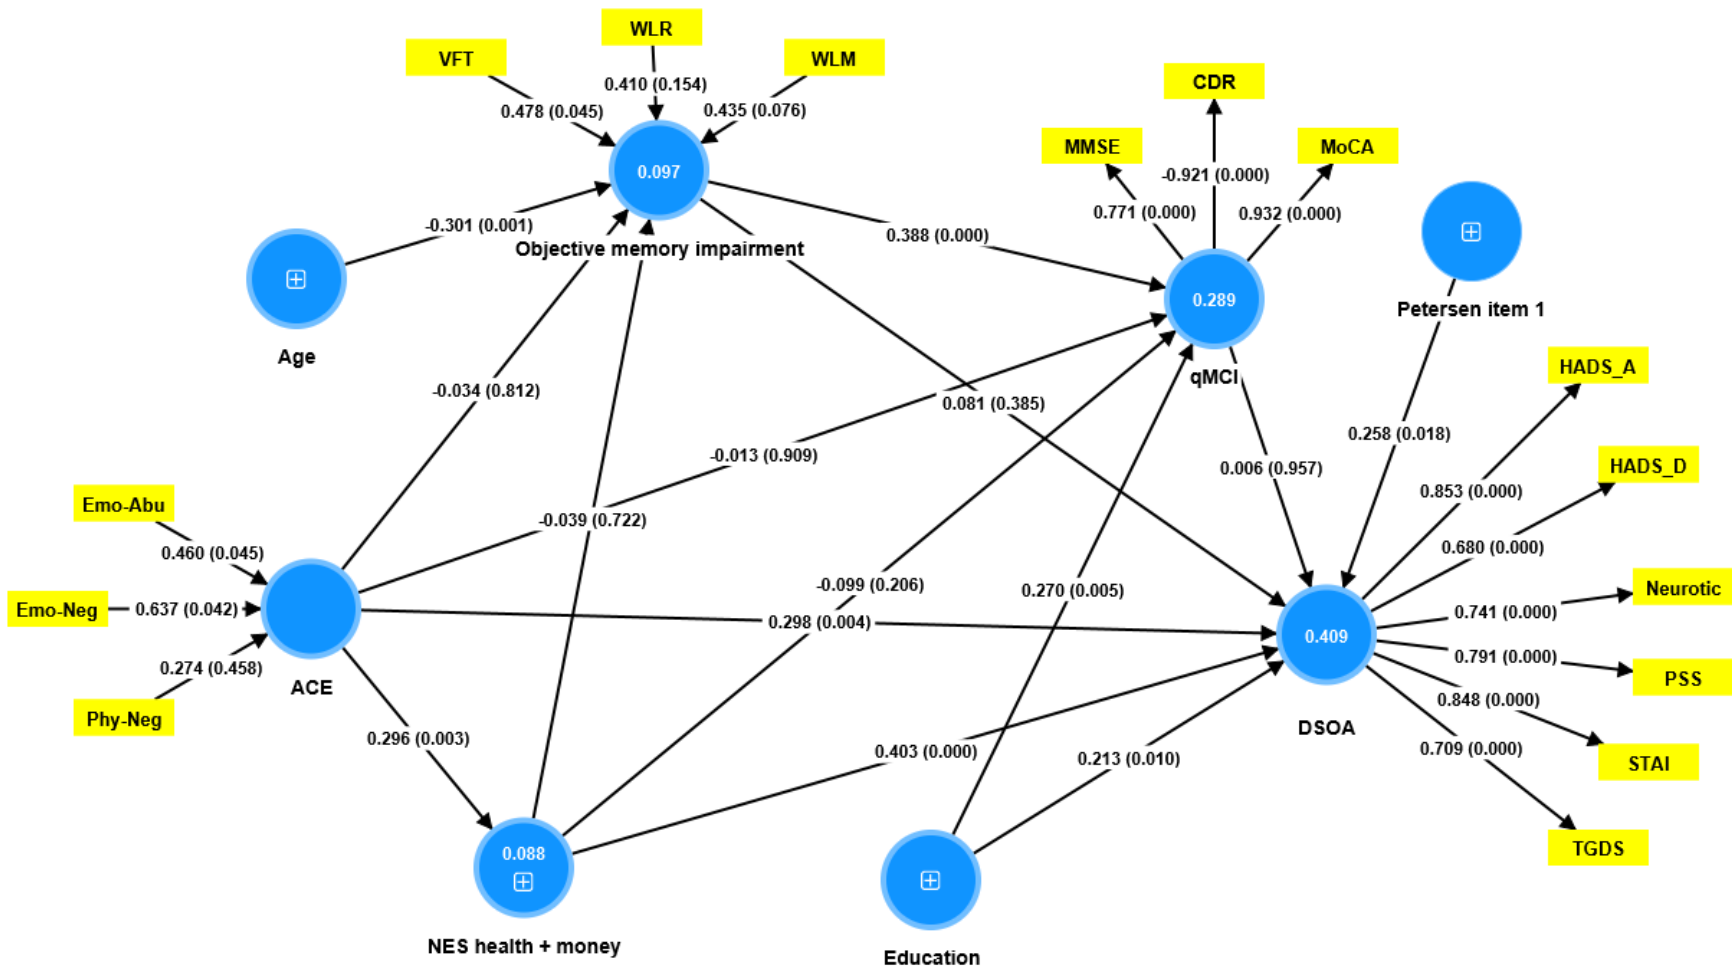

Source: https://medrxiv.org/content/10.1101/2023.11.03.23297890v1.full.pdf
